# Supplementary material for: pH-Sensitive nanocargo based on smart polymer functionalized graphene oxide for site-specific drug delivery
Source: Royal Society of Chemistry journal article supplement (doi:10.1039/c3cp00008g), 2013-01-01
Supplement: c3cp00008g.pdf [file c3cp00008g.pdf]

## Supporting Information

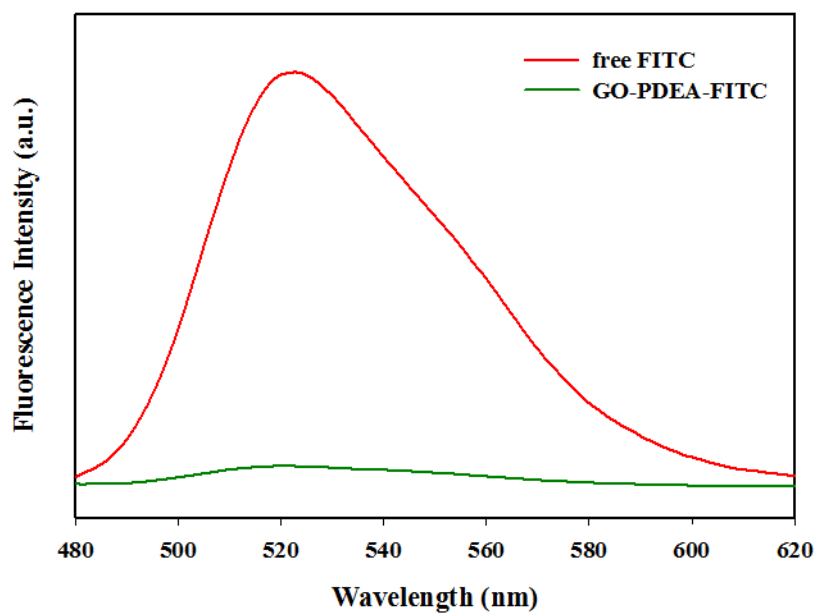

Figure S1. Fluorescence spectra of free FITC and GO-PDEA-FITC at  $[\text{FITC}] = 1 \mu\text{M}$ .
